# Supplementary material
Source: PubMed Central journal article supplement (PMC6140579)
Supplement: CJN.12641117SupplementaryData.pdf [file CJN.12641117SupplementaryData.pdf]

*Supplemental material is neither peer-reviewed nor thoroughly edited by CJASN. The authors alone are responsible for the accuracy and presentation of the material.*

## SUPPLEMENTAL MATERIAL

### REGULATORY CONSIDERATIONS FOR HEMODIAFILTRATION IN THE UNITED STATES

Richard A. Ward, Ph.D., Jörg Vienken, Ph.D., Douglas M. Silverstein, M.D., Stephen Ash, M.D. and Bernard Canaud, M.D., Ph.D., on behalf of the Kidney Health Initiative HDF Workgroup

**Appendix 1:** Members of the Kidney Health Initiative “Regulatory Policies and Positions Affecting Device Approval in the US: Tools to Assess the Process and Foster Device Development for Patients with Kidney Disease” Workgroup’s Hemodiafiltration Subgroup and their affiliations

Members of the Kidney Health Initiative “Regulatory Policies and Positions Affecting Device Approval in the US: Tools to Assess the Process and Foster Device Development for Patients with Kidney Disease” Workgroup’s Hemodiafiltration Subgroup and their affiliations

**Stephen R. Ash, MD, FACP**  
HemoCleanse Technologies, LLC,  
Indiana University Health Arnett, and  
Ash Access Technology, Inc.  
**(Workgroup Co-chair)**

**Bernard Canaud, MD, PhD**  
Fresenius Medical Care – Germany  
Montpellier University, France

**Greg Collins, PhD**  
Nephros, Inc.

**William Fissell, MD**  
Vanderbilt University

**Gema Gonzalez, MS**  
Center for Devices and Radiological  
Health (CDRH), FDA

**Shani Haugen, PhD**  
Center for Drug Evaluation and  
Research (CDER), FDA

**Robert Kossmann, MD, FACP, FASN**  
Fresenius Medical Care - North  
America

**Carolyn Y. Neuland, PhD**  
Center for Devices and Radiological  
Health (CDRH), FDA  
(KHI Board of Directors Liaison)

**Douglas M. Silverstein, MD**  
Center for Devices and Radiological  
Health (CDRH), FDA  
**(Workgroup Co-chair)**

**Todd Snell**  
NxStage Medical, Inc.

**Jim Summerton**  
Nephros, Inc.

**Jorg Vienken, PhD**  
Usingen, Germany

**Richard A. Ward, PhD**  
**New Zealand**

**Shen Xiao, MD**  
Center for Devices and Radiological  
Health (CDRH), FDA
